# Supplementary material for: Herpes simplex virus type 1 modifies the protein composition of extracellular vesicles to promote neurite outgrowth and neuroinfection
Source: PubMed Central journal article supplement (PMC10865794; doi:10.1128/mbio.03308-23), 2024-01-26

# S1 Figure

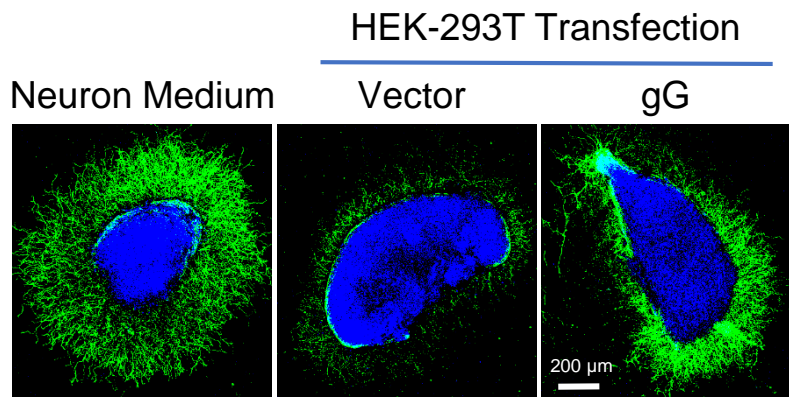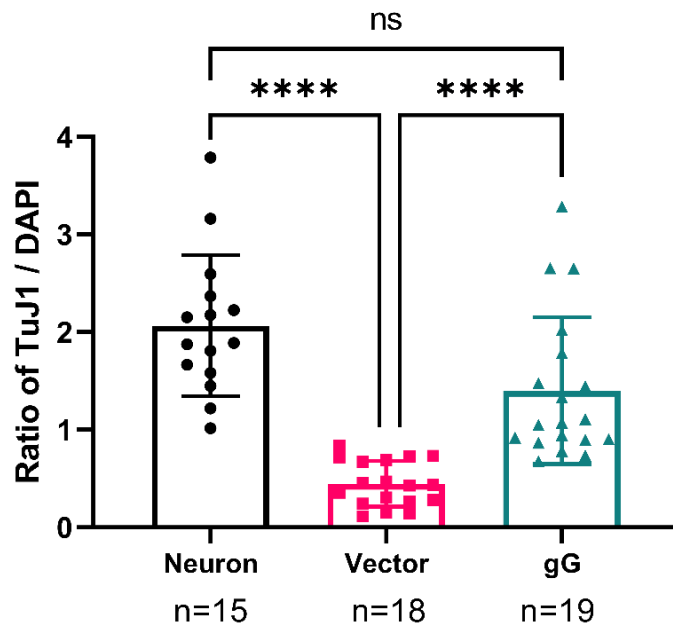

# S2 Figure

A

HSV1-CheGL

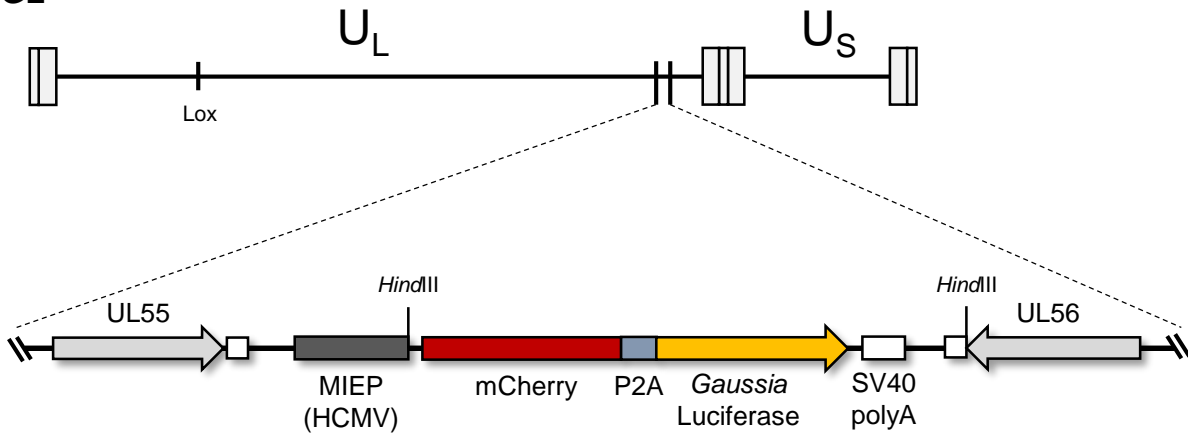

HSV1-CheGL- $\Delta$ gG

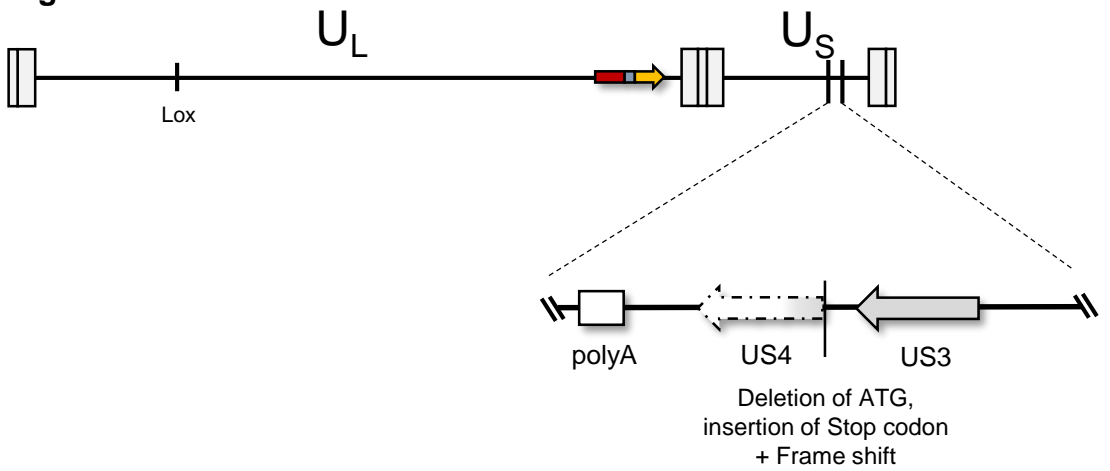

B

Vero

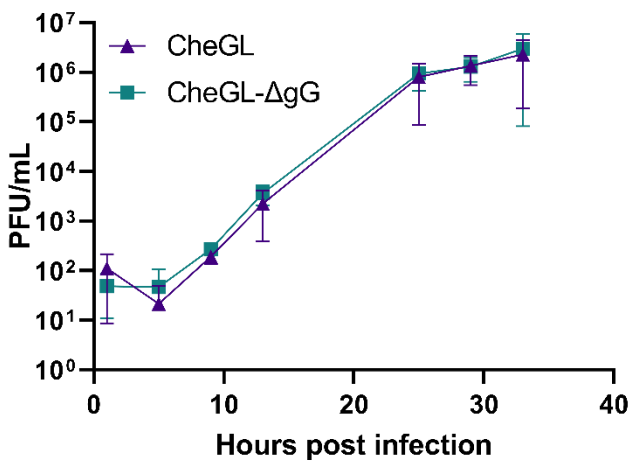

ARPE-19

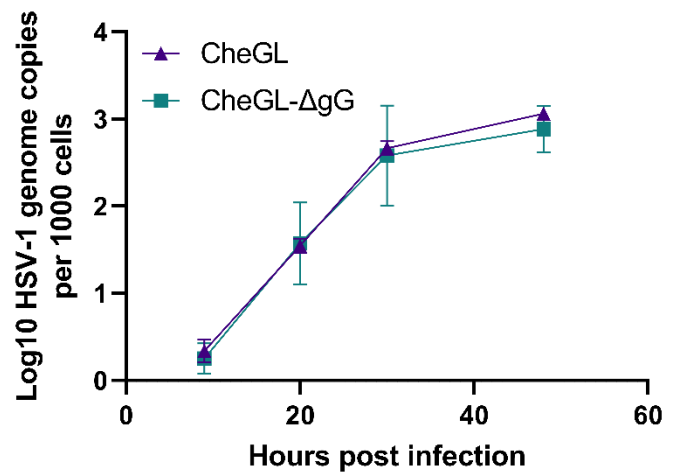

# S3 Figure

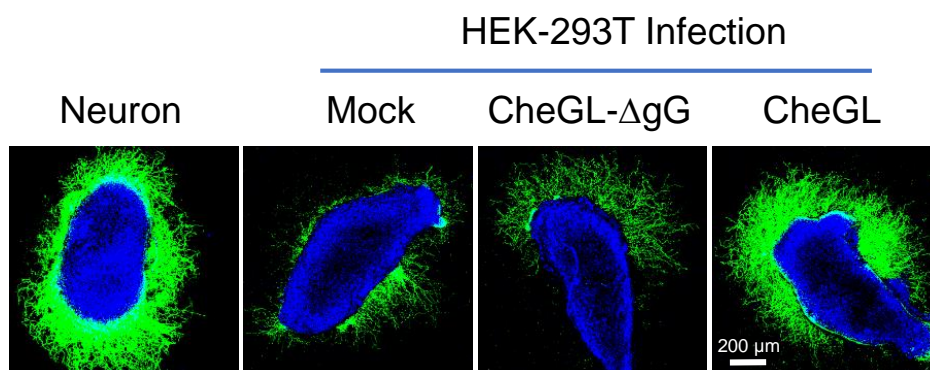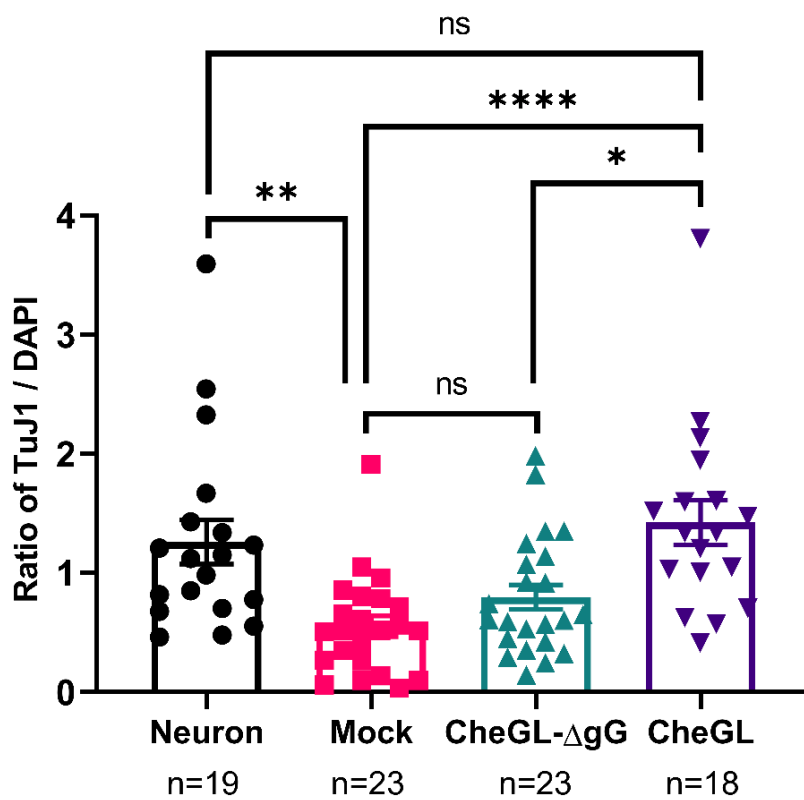

# S4 Figure

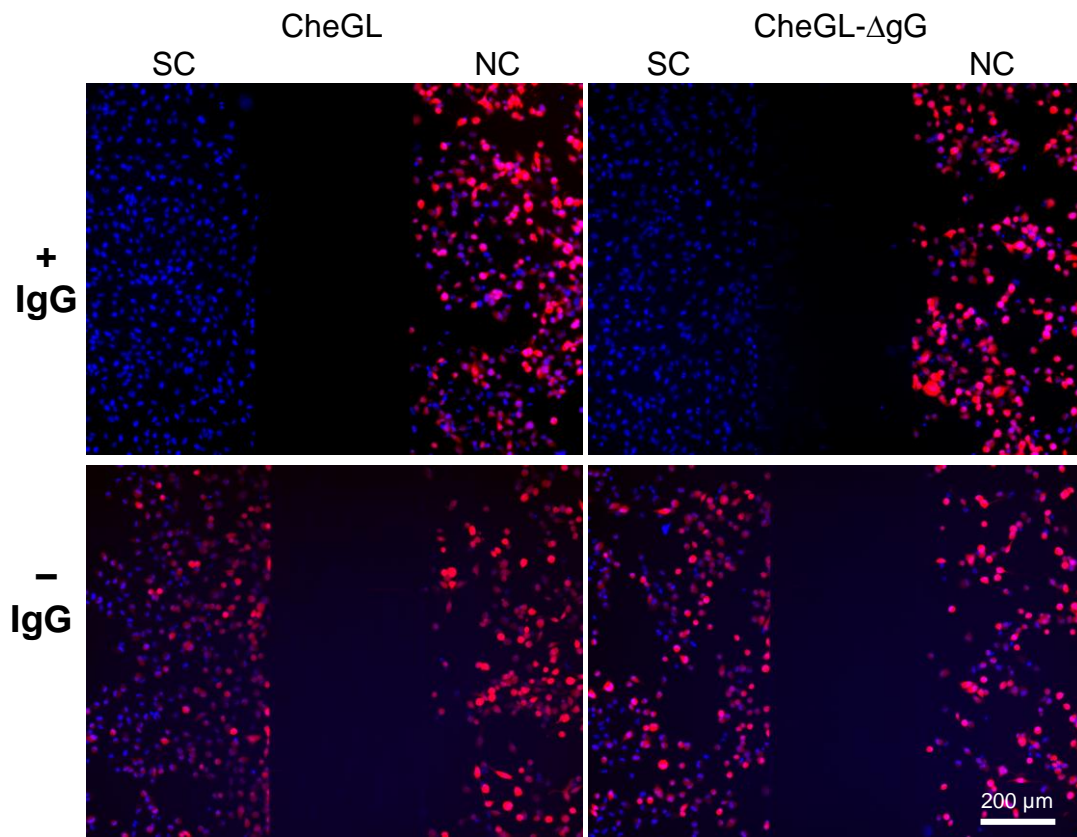

# S5 Figure

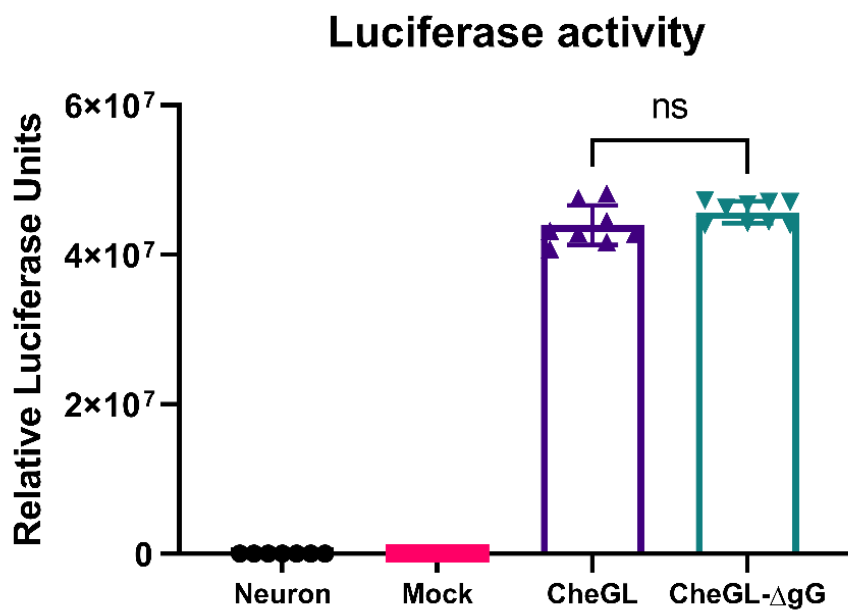

# S6 Figure

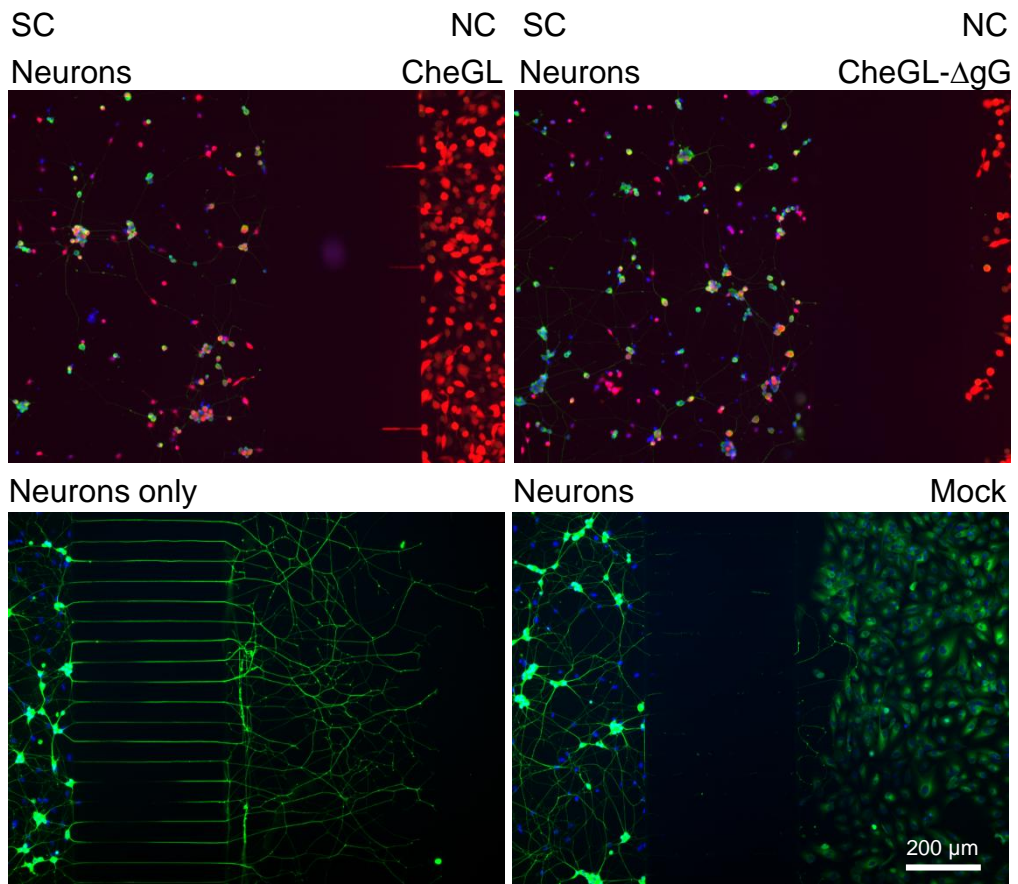

# S7 Figure

A

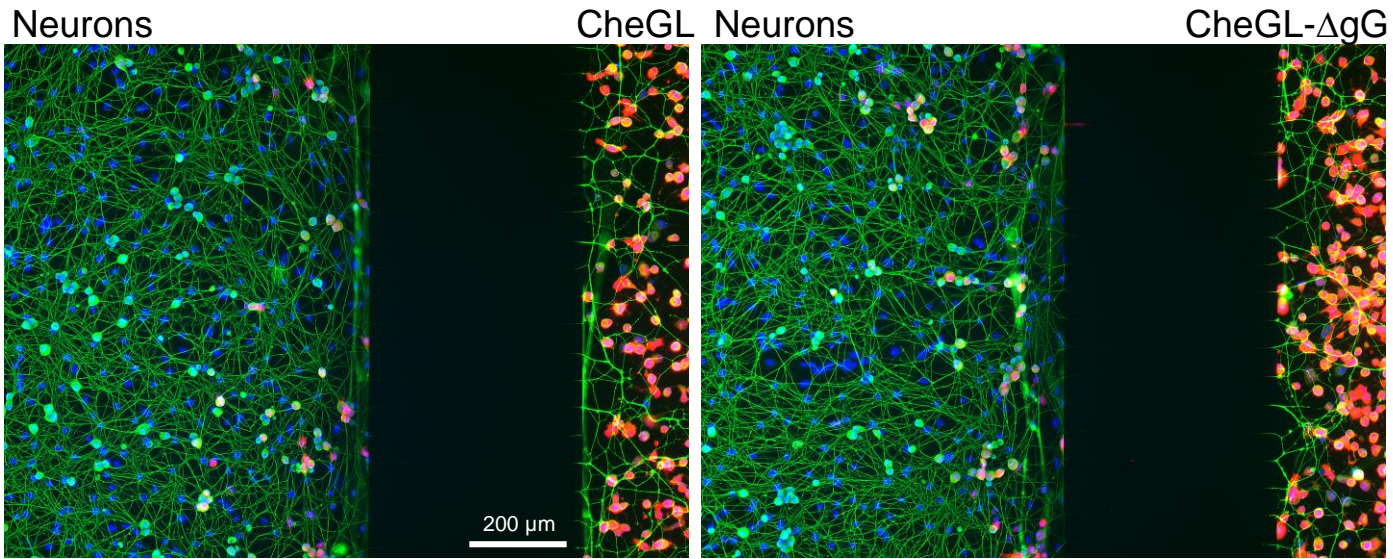

B

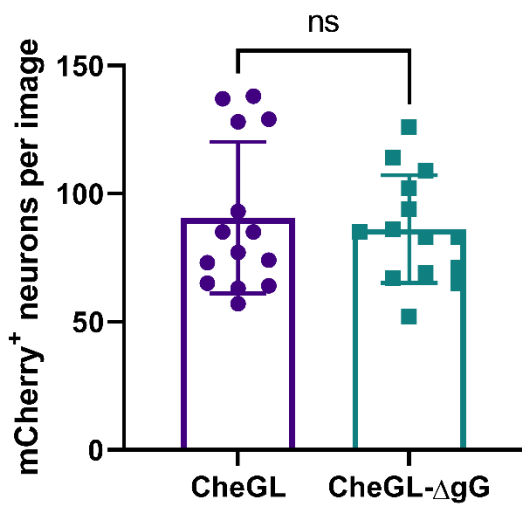

# S8 Figure

A

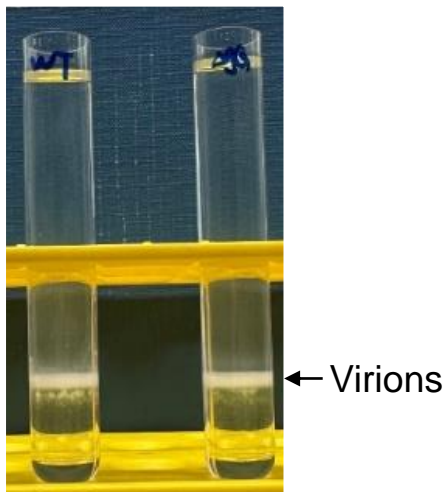

B

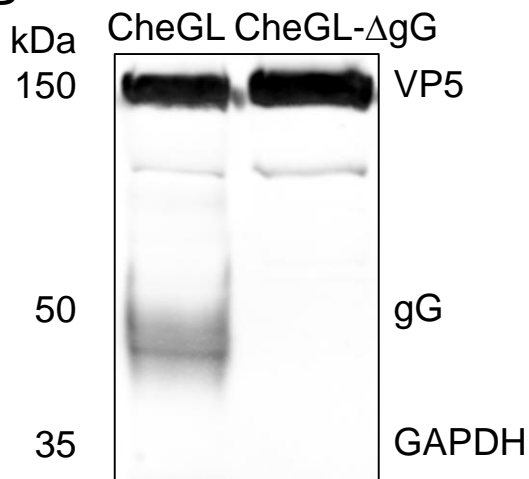

C

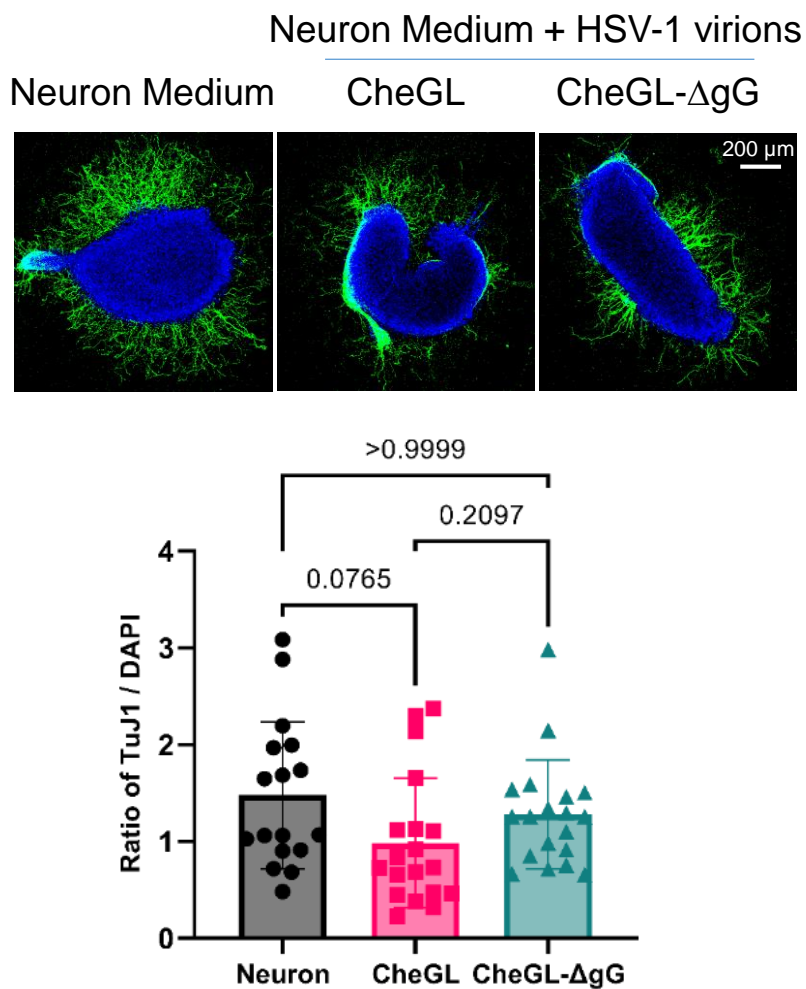



# S9 Figure

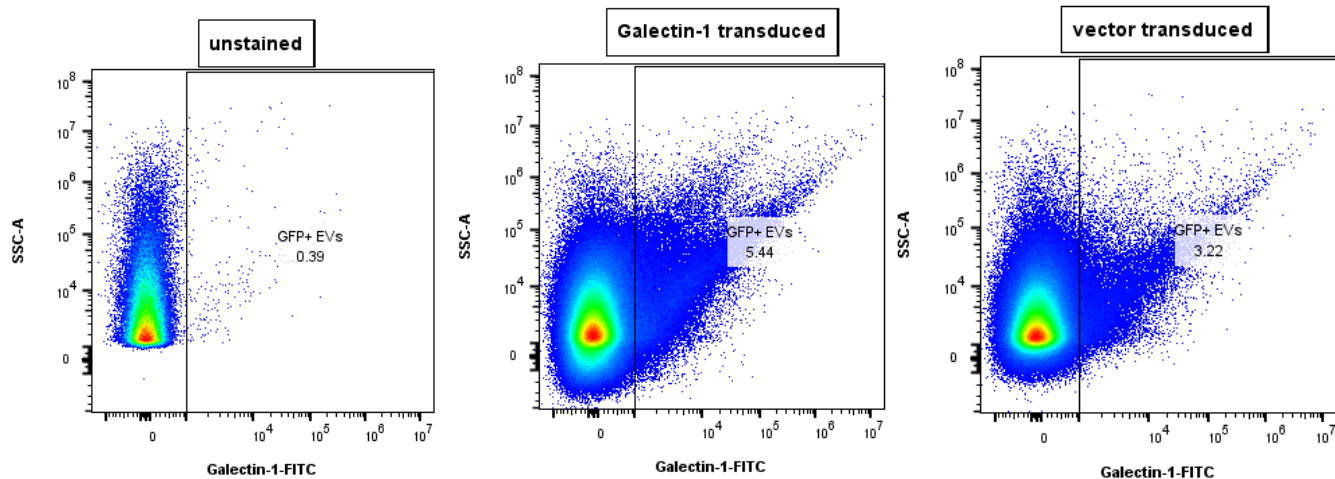

# S10 Figure

Fig. 4D

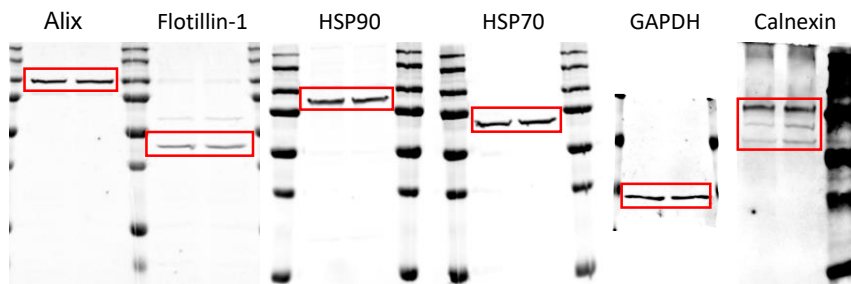

Fig. 4E

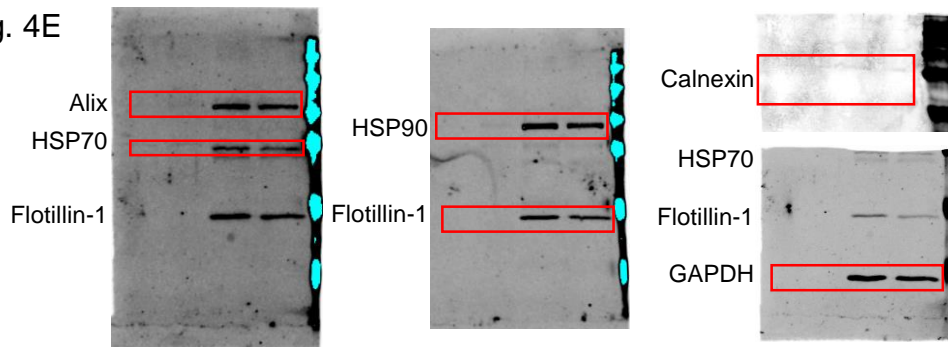

Fig. 6C

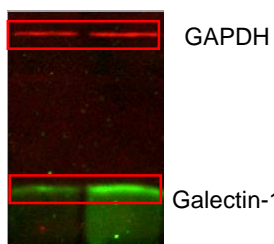

Fig. 6D

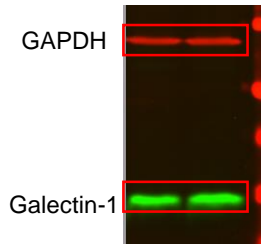

Fig. 7A

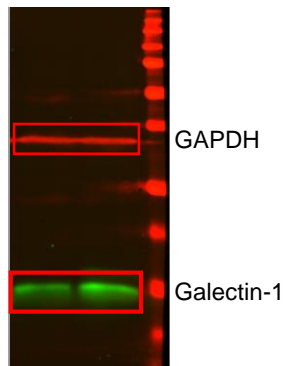

Fig. 7B

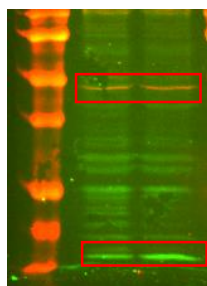

Fig. 7C

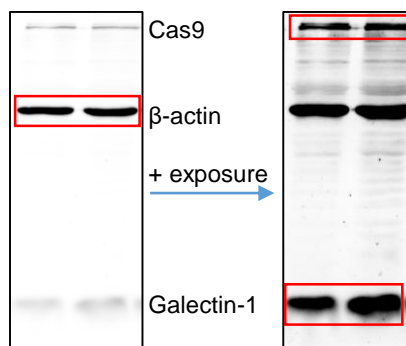

Fig. 7D

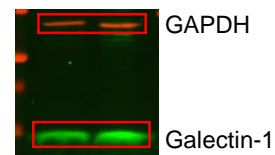

Supplement: mbio.03308-23-s0002.pdf [file mbio.03308-23-s0002.pdf]
